# Supplementary material for: Simultaneous Occurrence of Hypospadias and Bilateral Cleft Lip and Jaw in a Crossbred Calf: Clinical, Computer Tomographic, and Genomic Characterization
Source: MDPI journal article supplement (doi:10.3390/ani13101709), 2023-05-22
Supplement: s1 [file s1]

# Simultaneous occurrence of hypospadias and bilateral cleft lip and jaw in a crossbred calf: clinical, computer tomographic and genomic characterization

Simona Marc<sup>†1,2</sup>, Alexandru Eugeniu Mizeranschi<sup>†3</sup>, Cristina Paul<sup>4\*</sup>, Gabriel Otavă<sup>1,2</sup>, Jelena Savici<sup>1</sup>, Bogdan Sicoe<sup>1</sup>, Iuliu Torda<sup>1,2</sup>, Ioan Huțu<sup>1,2</sup>, Călin Mircu<sup>1,2</sup>, Daniela Elena Ilie<sup>3</sup>, Mihai Carabaș<sup>5</sup>, and Oana Maria Boldura<sup>†1,2</sup>

<sup>1</sup> University of Life Sciences "King Mihai I" from Timisoara, Faculty of Veterinary Medicine, Calea Aradului 119, 300645 Timisoara, Romania; simona.marc@usab-tm.ro (S.M.); gabrielotava@usab-tm.ro (G.O.); jelenasavici@usab-tm.ro (J.S.); bogdan.sicoe@usab-tm.ro (B.S.); iuliu.torda@usab-tm.ro (I.T.); ioanhutu@usab-tm.ro (I.H.); calinmircu@usab-tm.ro (C.M.); oanaboldura@usab-tm.ro (O.B.);

<sup>2</sup> University of Life Sciences "King Mihai I" from Timisoara, Research Institute for Biosecurity and Bioengineering"; simona.marc@usab-tm.ro (S.M.); gabrielotava@usab-tm.ro (G.O.); iuliu.torda@usab-tm.ro (I.T.); ioanhutu@usab-tm.ro (I.H.); calinmircu@usab-tm.ro (C.M.); oanaboldura@usab-tm.ro (O.B.)

<sup>3</sup> The Molecular Research Department, Research and Development Station for Bovine Arad, Bodroglui Street, 32, 310059 Arad, Romania, alex.mizeranschi@gmail.com (A.E.M.), danailie@animalsci-tm.ro (D.E.I.);

<sup>4</sup> Politehnica University Timisoara, Faculty of Industrial Chemistry and Environmental Engineering, Department of Applied Chemistry and Engineering of Organic and Natural Compounds, Carol Telbisz 6, 300001 Timisoara, Romania; cristina.paul@upt.ro (C.P.);

<sup>5</sup> Politehnica University of Bucharest, Faculty of Automatic Control and Computer Science, Splaiul Independenței 313, 060042 Bucharest, Romania, mihai.carabas@cs.pub.ro (M.C.);

\* Correspondence: cristina.paul@upt.ro;

† These authors contributed equally to the work

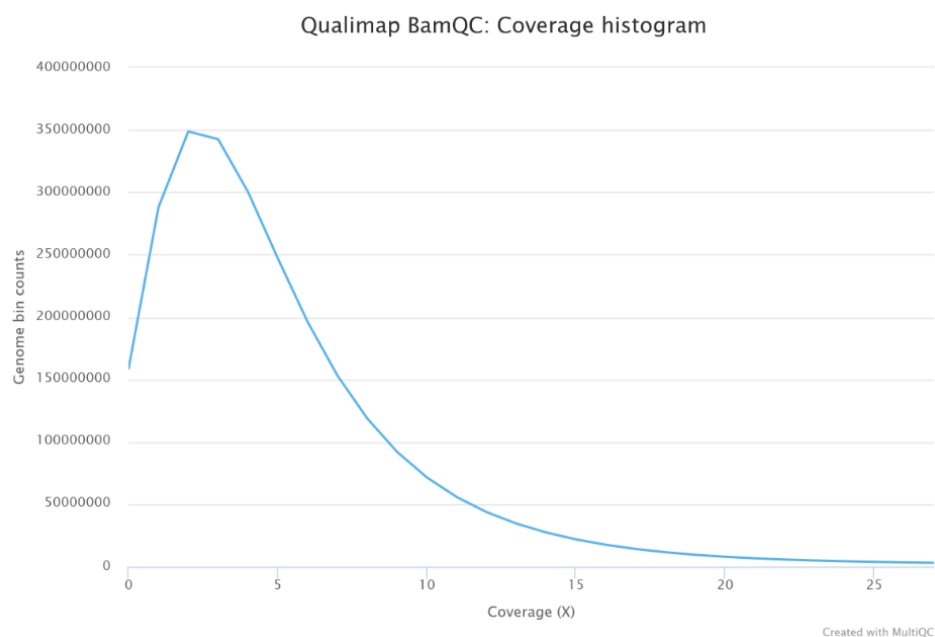

(a)

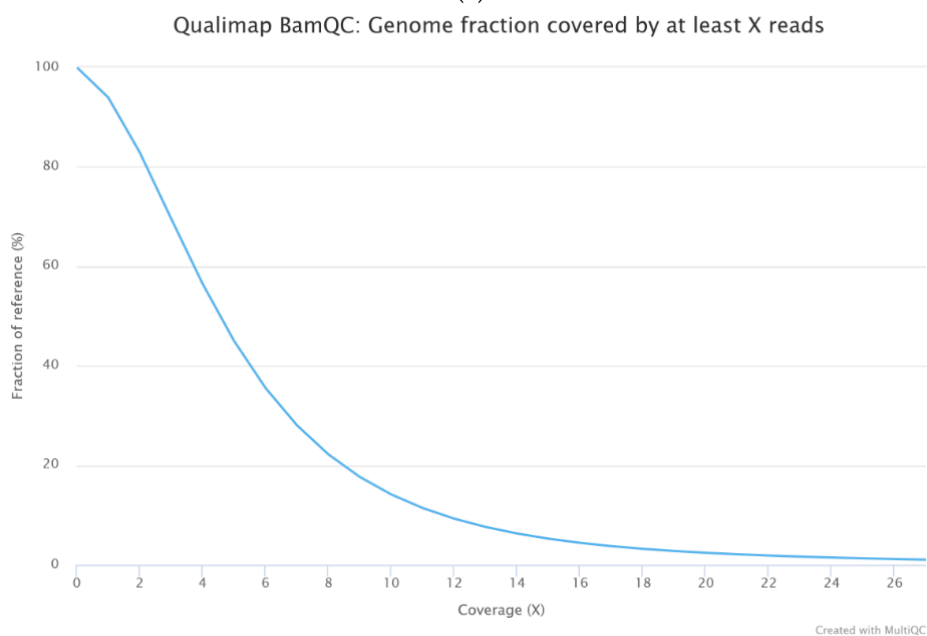

(b)

**Figure S1.** Average genome coverage: (a) Coverage histogram, (b) Genome fraction.
